# Supplementary material
Source: MDPI journal article supplement (https://www.mdpi.com/2075-1680/12/9/884)
Supplement: s1 [file s1]

```
. fp <mean1>, dimension(3): regress absdiff <mean1>
(fitting 164 models)
(....10%....20%....30%....40%....50%....60%....70%....80%....90%....100%)
```

Fractional polynomial comparisons:

| mean1   | Test<br>df | Deviance | Residual<br>std. dev. | Deviance<br>diff. | P     | Powers |
|---------|------------|----------|-----------------------|-------------------|-------|--------|
| omitted | 5          | 2659.026 | 78.550                | 57.356            | 0.000 |        |
| linear  | 4          | 2603.657 | 69.794                | 1.986             | 0.746 | 1      |
| m = 1   | 3          | 2603.657 | 69.794                | 1.986             | 0.585 | 1      |
| m = 2   | 1          | 2601.905 | 69.682                | 0.235             | 0.633 | .5 2   |
| m = 3   | 0          | 2601.671 | 69.800                | 0.000             | --    | .5 3 3 |

Note: **Test df** is degrees of freedom, and **P** =  $P > F$  is sig. level for tests comparing models vs. model with  $m = 3$  based on deviance difference,  $F(df, 224)$ .

| Source   | SS         | df  | MS         | Number of obs | = | 230    |
|----------|------------|-----|------------|---------------|---|--------|
| Model    | 311851.882 | 3   | 103950.627 | F(3, 226)     | = | 21.34  |
| Residual | 1101092.25 | 226 | 4872.08959 | Prob > F      | = | 0.0000 |
|          |            |     |            | R-squared     | = | 0.2207 |
|          |            |     |            | Adj R-squared | = | 0.2104 |
| Total    | 1412944.13 | 229 | 6170.0617  | Root MSE      | = | 69.8   |

| absdiff | Coefficient | Std. err. | t     | P> t  | [95% conf. interval] |          |
|---------|-------------|-----------|-------|-------|----------------------|----------|
| mean1_1 | 1.019461    | .5767764  | 1.77  | 0.078 | -.1170861            | 2.156009 |
| mean1_2 | 6.64e-08    | 6.24e-08  | 1.06  | 0.288 | -5.66e-08            | 1.89e-07 |
| mean1_3 | -7.62e-09   | 7.55e-09  | -1.01 | 0.314 | -2.25e-08            | 7.26e-09 |
| _cons   | .8186861    | 6.371187  | 0.13  | 0.898 | -11.73584            | 13.37321 |

```
. fp_select, alpha(0.05)
```

selected FP model: powers = (1), df = 4

Figure S1. Stata output for  $m=3$ .
