# Supplementary material
Source: MDPI journal article supplement (https://www.mdpi.com/2075-1680/12/9/884)
Supplement: s1 [file s1]

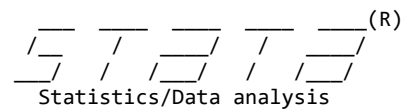

User: Stata output  
Project: 22 June 2023

```

1 . do "Z:\a99zz Ablage alter Mappen\58 DC_and_DR_perc_curves\2021_04_23-interobserver data\_analyse_2023_06_22.do"
2 . /*
   > STATA source code (dated 22 June 2023)
   > Paper: Modelling Bland-Altman Limits of Agreement with fractional polynomials
   > Authors: Oke Gerke & Sören Möller
   > Journal: Axioms (MDPI)
   > */
3 . cd "c:\temp"
   c:\temp
4 . use "interrater.dta", clear
5 .
6 . /*inspection of paired differences*/
7 . gen mean = (ct_agatston_score + cac_valid_2) / 2
8 . gen diff = ct_agatston_score - cac_valid_2
9 .
10 . hist diff, normal
    (bin=15, start=-538, width=85.2)
11 . stem diff

Stem-and-leaf plot for diff

diff rounded to integers

-5** | 38,23
-4** |
-4** |
-3** |
-3** |
-2** |
-2** |
-1** |
-1** | 22,01
-0** | 84,82,72,51,50
-0** | 49,45,42,42,38,21,14,12,10,10,08,07,06,06,05,05,05,05,04,03, ... (40)
 0** | 00,00,00,00,00,00,00,00,00,00,00,00,00,00,00,00,00,00, ... (177)
 0** | 62,64
 1** |
 1** |
 2** |
 2** |
 3** |
 3** |
 4** |
 4** |
 5** | 38
 5** |
 6** |
 6** |
 7** | 40
12 .
13 . tab diff

```

| diff | Freq. | Percent | Cum. |
|------|-------|---------|------|
| -538 | 1     | 0.43    | 0.43 |
| -523 | 1     | 0.43    | 0.87 |
| -122 | 1     | 0.43    | 1.30 |
| -101 | 1     | 0.43    | 1.74 |
| -84  | 1     | 0.43    | 2.17 |
| -82  | 1     | 0.43    | 2.61 |
| -72  | 1     | 0.43    | 3.04 |
| -51  | 1     | 0.43    | 3.48 |
| -50  | 1     | 0.43    | 3.91 |
| -49  | 1     | 0.43    | 4.35 |

|           |     |        |        |
|-----------|-----|--------|--------|
| -44.69995 | 1   | 0.43   | 4.78   |
| -42       | 2   | 0.87   | 5.65   |
| -38       | 1   | 0.43   | 6.09   |
| -21       | 1   | 0.43   | 6.52   |
| -14       | 1   | 0.43   | 6.96   |
| -12       | 1   | 0.43   | 7.39   |
| -10       | 2   | 0.87   | 8.26   |
| -8        | 1   | 0.43   | 8.70   |
| -7        | 1   | 0.43   | 9.13   |
| -6.5      | 1   | 0.43   | 9.57   |
| -6        | 1   | 0.43   | 10.00  |
| -5        | 4   | 1.74   | 11.74  |
| -4        | 1   | 0.43   | 12.17  |
| -3        | 5   | 2.17   | 14.35  |
| -2        | 4   | 1.74   | 16.09  |
| -1        | 10  | 4.35   | 20.43  |
| -.9000244 | 1   | 0.43   | 20.87  |
| -.8000031 | 1   | 0.43   | 21.30  |
| -.5       | 3   | 1.30   | 22.61  |
| -.4000244 | 1   | 0.43   | 23.04  |
| -.4000001 | 1   | 0.43   | 23.48  |
| -.3999996 | 1   | 0.43   | 23.91  |
| -.3000031 | 2   | 0.87   | 24.78  |
| -.3000002 | 2   | 0.87   | 25.65  |
| -.2000008 | 2   | 0.87   | 26.52  |
| -.1000004 | 2   | 0.87   | 27.39  |
| 0         | 101 | 43.91  | 71.30  |
| .0999985  | 2   | 0.87   | 72.17  |
| .1999969  | 2   | 0.87   | 73.04  |
| .2000008  | 1   | 0.43   | 73.48  |
| .2999878  | 2   | 0.87   | 74.35  |
| .2999992  | 1   | 0.43   | 74.78  |
| .4000015  | 1   | 0.43   | 75.22  |
| .5999756  | 1   | 0.43   | 75.65  |
| .6999969  | 1   | 0.43   | 76.09  |
| 1         | 13  | 5.65   | 81.74  |
| 1.200001  | 1   | 0.43   | 82.17  |
| 1.5       | 1   | 0.43   | 82.61  |
| 1.699997  | 1   | 0.43   | 83.04  |
| 2         | 7   | 3.04   | 86.09  |
| 3         | 2   | 0.87   | 86.96  |
| 3.700012  | 2   | 0.87   | 87.83  |
| 4         | 4   | 1.74   | 89.57  |
| 4.799988  | 1   | 0.43   | 90.00  |
| 5         | 1   | 0.43   | 90.43  |
| 6.900024  | 1   | 0.43   | 90.87  |
| 7         | 1   | 0.43   | 91.30  |
| 8         | 2   | 0.87   | 92.17  |
| 9         | 1   | 0.43   | 92.61  |
| 11.4      | 1   | 0.43   | 93.04  |
| 12        | 1   | 0.43   | 93.48  |
| 14        | 2   | 0.87   | 94.35  |
| 14.5      | 1   | 0.43   | 94.78  |
| 15        | 1   | 0.43   | 95.22  |
| 18        | 2   | 0.87   | 96.09  |
| 20        | 1   | 0.43   | 96.52  |
| 23        | 2   | 0.87   | 97.39  |
| 34.5      | 1   | 0.43   | 97.83  |
| 48.70001  | 1   | 0.43   | 98.26  |
| 61.5      | 1   | 0.43   | 98.70  |
| 63.70001  | 1   | 0.43   | 99.13  |
| 538       | 1   | 0.43   | 99.57  |
| 740       | 1   | 0.43   | 100.00 |
| Total     | 230 | 100.00 |        |

14 . tab study

| 1-DanRisk,<br>2-DANCAVAS | Freq. | Percent | Cum.   |
|--------------------------|-------|---------|--------|
| DanRisk                  | 129   | 56.09   | 56.09  |
| DANCAVAS                 | 101   | 43.91   | 100.00 |
| Total                    | 230   | 100.00  |        |

15 .

16 . tabstat diff, statistics(N mean sd min p5 p10 q p90 p95 max) by(study)

Summary for variables: diff

Group variable: study (1-DanRisk, 2-DANCAVAS)

| study    | N   | Mean      | SD       | Min  | p5   | p10  | p25       | p50 | p75      | p90      |
|----------|-----|-----------|----------|------|------|------|-----------|-----|----------|----------|
| DanRisk  | 129 | -8.155039 | 83.33577 | -538 | -51  | -14  | -1        | 0   | 0        | 4        |
| DANCAVAS | 101 | 8.295049  | 75.53489 | -122 | -6.5 | -1   | -.1000004 | 0   | 1        | 7        |
| Total    | 230 | -.9313044 | 80.2513  | -538 | -42  | -5.5 | -.3000002 | 0   | .4000015 | 4.899994 |

17 .

18 . sort study diff

19 . list

|     | study   | record~d | ct_agat~e | cac_va~2 | mean   | diff |
|-----|---------|----------|-----------|----------|--------|------|
| 1.  | DanRisk | 2658     | 3601      | 4139     | 3870   | -538 |
| 2.  | DanRisk | 2407     | 6         | 529      | 267.5  | -523 |
| 3.  | DanRisk | 1269     | 0         | 101      | 50.5   | -101 |
| 4.  | DanRisk | 2418     | 620       | 704      | 662    | -84  |
| 5.  | DanRisk | 1025     | 0         | 82       | 41     | -82  |
| 6.  | DanRisk | 1545     | 400       | 472      | 436    | -72  |
| 7.  | DanRisk | 2032     | 0         | 51       | 25.5   | -51  |
| 8.  | DanRisk | 1916     | 10        | 60       | 35     | -50  |
| 9.  | DanRisk | 2677     | 1180      | 1229     | 1204.5 | -49  |
| 10. | DanRisk | 1862     | 898       | 940      | 919    | -42  |
| 11. | DanRisk | 2779     | 3506      | 3548     | 3527   | -42  |
| 12. | DanRisk | 1665     | 244       | 282      | 263    | -38  |
| 13. | DanRisk | 2534     | 0         | 14       | 7      | -14  |
| 14. | DanRisk | 2942     | 55        | 67       | 61     | -12  |
| 15. | DanRisk | 2561     | 278       | 288      | 283    | -10  |
| 16. | DanRisk | 1780     | 0         | 8        | 4      | -8   |
| 17. | DanRisk | 2038     | 877       | 883      | 880    | -6   |
| 18. | DanRisk | 1952     | 155       | 160      | 157.5  | -5   |
| 19. | DanRisk | 1449     | 11        | 16       | 13.5   | -5   |
| 20. | DanRisk | 2079     | 406       | 411      | 408.5  | -5   |
| 21. | DanRisk | 1802     | 0         | 5        | 2.5    | -5   |
| 22. | DanRisk | 1703     | 108       | 111      | 109.5  | -3   |
| 23. | DanRisk | 1800     | 0         | 3        | 1.5    | -3   |
| 24. | DanRisk | 2083     | 0         | 3        | 1.5    | -3   |
| 25. | DanRisk | 1719     | 0         | 3        | 1.5    | -3   |
| 26. | DanRisk | 2211     | 0         | 3        | 1.5    | -3   |
| 27. | DanRisk | 2630     | 0         | 2        | 1      | -2   |
| 28. | DanRisk | 2752     | 0         | 2        | 1      | -2   |
| 29. | DanRisk | 2147     | 0         | 2        | 1      | -2   |
| 30. | DanRisk | 1461     | 0         | 1        | .5     | -1   |
| 31. | DanRisk | 1014     | 575       | 576      | 575.5  | -1   |
| 32. | DanRisk | 1758     | 0         | 1        | .5     | -1   |
| 33. | DanRisk | 2164     | 31        | 32       | 31.5   | -1   |
| 34. | DanRisk | 2179     | 72        | 73       | 72.5   | -1   |

|     |         |      |      |      |      |    |
|-----|---------|------|------|------|------|----|
| 35. | DanRisk | 1762 | 4    | 5    | 4.5  | -1 |
| 36. | DanRisk | 2060 | 0    | 1    | .5   | -1 |
| 37. | DanRisk | 2845 | 562  | 562  | 562  | 0  |
| 38. | DanRisk | 2248 | 72   | 72   | 72   | 0  |
| 39. | DanRisk | 2489 | 84   | 84   | 84   | 0  |
| 40. | DanRisk | 2687 | 0    | 0    | 0    | 0  |
| 41. | DanRisk | 2879 | 0    | 0    | 0    | 0  |
| 42. | DanRisk | 2375 | 0    | 0    | 0    | 0  |
| 43. | DanRisk | 1494 | 0    | 0    | 0    | 0  |
| 44. | DanRisk | 1967 | 0    | 0    | 0    | 0  |
| 45. | DanRisk | 2365 | 0    | 0    | 0    | 0  |
| 46. | DanRisk | 1544 | 1    | 1    | 1    | 0  |
| 47. | DanRisk | 2702 | 0    | 0    | 0    | 0  |
| 48. | DanRisk | 1433 | 0    | 0    | 0    | 0  |
| 49. | DanRisk | 1394 | 0    | 0    | 0    | 0  |
| 50. | DanRisk | 2913 | 0    | 0    | 0    | 0  |
| 51. | DanRisk | 2816 | 0    | 0    | 0    | 0  |
| 52. | DanRisk | 2445 | 1    | 1    | 1    | 0  |
| 53. | DanRisk | 2603 | 0    | 0    | 0    | 0  |
| 54. | DanRisk | 1143 | 0    | 0    | 0    | 0  |
| 55. | DanRisk | 2253 | 0    | 0    | 0    | 0  |
| 56. | DanRisk | 2043 | 0    | 0    | 0    | 0  |
| 57. | DanRisk | 1428 | 0    | 0    | 0    | 0  |
| 58. | DanRisk | 2478 | 0    | 0    | 0    | 0  |
| 59. | DanRisk | 1221 | 0    | 0    | 0    | 0  |
| 60. | DanRisk | 1322 | 0    | 0    | 0    | 0  |
| 61. | DanRisk | 1898 | 0    | 0    | 0    | 0  |
| 62. | DanRisk | 1899 | 0    | 0    | 0    | 0  |
| 63. | DanRisk | 2243 | 0    | 0    | 0    | 0  |
| 64. | DanRisk | 1572 | 0    | 0    | 0    | 0  |
| 65. | DanRisk | 2952 | 0    | 0    | 0    | 0  |
| 66. | DanRisk | 2132 | 0    | 0    | 0    | 0  |
| 67. | DanRisk | 1990 | 0    | 0    | 0    | 0  |
| 68. | DanRisk | 2257 | 2785 | 2785 | 2785 | 0  |
| 69. | DanRisk | 2554 | 0    | 0    | 0    | 0  |
| 70. | DanRisk | 2388 | 271  | 271  | 271  | 0  |
| 71. | DanRisk | 2348 | 107  | 107  | 107  | 0  |
| 72. | DanRisk | 1017 | 74   | 74   | 74   | 0  |
| 73. | DanRisk | 1194 | 0    | 0    | 0    | 0  |
| 74. | DanRisk | 1034 | 0    | 0    | 0    | 0  |
| 75. | DanRisk | 1040 | 0    | 0    | 0    | 0  |
| 76. | DanRisk | 2655 | 44   | 44   | 44   | 0  |
| 77. | DanRisk | 2442 | 0    | 0    | 0    | 0  |
| 78. | DanRisk | 2560 | 0    | 0    | 0    | 0  |
| 79. | DanRisk | 2314 | 0    | 0    | 0    | 0  |
| 80. | DanRisk | 2772 | 1    | 1    | 1    | 0  |
| 81. | DanRisk | 1792 | 34   | 34   | 34   | 0  |
| 82. | DanRisk | 2516 | 0    | 0    | 0    | 0  |
| 83. | DanRisk | 2356 | 0    | 0    | 0    | 0  |
| 84. | DanRisk | 1296 | 0    | 0    | 0    | 0  |
| 85. | DanRisk | 2420 | 10   | 10   | 10   | 0  |
| 86. | DanRisk | 1228 | 0    | 0    | 0    | 0  |
| 87. | DanRisk | 2705 | 0    | 0    | 0    | 0  |
| 88. | DanRisk | 1625 | 0    | 0    | 0    | 0  |
| 89. | DanRisk | 1205 | 33   | 33   | 33   | 0  |
| 90. | DanRisk | 1100 | 0    | 0    | 0    | 0  |
| 91. | DanRisk | 2139 | 353  | 353  | 353  | 0  |
| 92. | DanRisk | 1323 | 0    | 0    | 0    | 0  |
| 93. | DanRisk | 1357 | 35   | 35   | 35   | 0  |
| 94. | DanRisk | 1086 | 166  | 166  | 166  | 0  |

|      |          |         |           |      |         |           |
|------|----------|---------|-----------|------|---------|-----------|
| 95.  | DanRisk  | 1599    | 0         | 0    | 0       | 0         |
| 96.  | DanRisk  | 1871    | 0         | 0    | 0       | 0         |
| 97.  | DanRisk  | 1601    | 0         | 0    | 0       | 0         |
| 98.  | DanRisk  | 1712    | 0         | 0    | 0       | 0         |
| 99.  | DanRisk  | 2449    | 0         | 0    | 0       | 0         |
| 100. | DanRisk  | 2225    | 0         | 0    | 0       | 0         |
| 101. | DanRisk  | 2852    | 0         | 0    | 0       | 0         |
| 102. | DanRisk  | 2860    | 0         | 0    | 0       | 0         |
| 103. | DanRisk  | 2347    | 99        | 98   | 98.5    | 1         |
| 104. | DanRisk  | 1222    | 8         | 7    | 7.5     | 1         |
| 105. | DanRisk  | 1838    | 3         | 2    | 2.5     | 1         |
| 106. | DanRisk  | 1094    | 19        | 18   | 18.5    | 1         |
| 107. | DanRisk  | 1443    | 165       | 164  | 164.5   | 1         |
| 108. | DanRisk  | 2889    | 1         | 0    | .5      | 1         |
| 109. | DanRisk  | 2252    | 1         | 0    | .5      | 1         |
| 110. | DanRisk  | 2740    | 8         | 7    | 7.5     | 1         |
| 111. | DanRisk  | 1674    | 19        | 18   | 18.5    | 1         |
| 112. | DanRisk  | 1995    | 10        | 9    | 9.5     | 1         |
| 113. | DanRisk  | 2937    | 2         | 0    | 1       | 2         |
| 114. | DanRisk  | 2764    | 472       | 470  | 471     | 2         |
| 115. | DanRisk  | 2028    | 2         | 0    | 1       | 2         |
| 116. | DanRisk  | 1048    | 830       | 827  | 828.5   | 3         |
| 117. | DanRisk  | 2713    | 4         | 0    | 2       | 4         |
| 118. | DanRisk  | 2098    | 4         | 0    | 2       | 4         |
| 119. | DanRisk  | 1106    | 5         | 0    | 2.5     | 5         |
| 120. | DanRisk  | 2747    | 8         | 0    | 4       | 8         |
| 121. | DanRisk  | 1254    | 9         | 0    | 4.5     | 9         |
| 122. | DanRisk  | 1294    | 14        | 0    | 7       | 14        |
| 123. | DanRisk  | 2397    | 421       | 406  | 413.5   | 15        |
| 124. | DanRisk  | 1148    | 18        | 0    | 9       | 18        |
| 125. | DanRisk  | 1695    | 23        | 5    | 14      | 18        |
| 126. | DanRisk  | 1932    | 514       | 494  | 504     | 20        |
| 127. | DanRisk  | 1374    | 24        | 1    | 12.5    | 23        |
| 128. | DanRisk  | 2327    | 143       | 120  | 131.5   | 23        |
| 129. | DanRisk  | 2559    | 3600      | 3062 | 3331    | 538       |
| 130. | DANCAVAS | 85-2685 | 311       | 433  | 372     | -122      |
| 131. | DANCAVAS | 85-2747 | 3924.3    | 3969 | 3946.65 | -44.69995 |
| 132. | DANCAVAS | 85-2726 | 506       | 527  | 516.5   | -21       |
| 133. | DANCAVAS | 85-2696 | 512       | 522  | 517     | -10       |
| 134. | DANCAVAS | 85-2673 | 655       | 662  | 658.5   | -7        |
| 135. | DANCAVAS | 85-2700 | 47.5      | 54   | 50.75   | -6.5      |
| 136. | DANCAVAS | 85-2763 | 549       | 553  | 551     | -4        |
| 137. | DANCAVAS | 85-2701 | 208       | 210  | 209     | -2        |
| 138. | DANCAVAS | 85-2738 | 658       | 659  | 658.5   | -1        |
| 139. | DANCAVAS | 85-2736 | 629       | 630  | 629.5   | -1        |
| 140. | DANCAVAS | 85-2750 | 36        | 37   | 36.5    | -1        |
| 141. | DANCAVAS | 85-2749 | 1077.1    | 1078 | 1077.55 | -.9000244 |
| 142. | DANCAVAS | 85-2676 | 231.2     | 232  | 231.6   | -.8000031 |
| 143. | DANCAVAS | 85-2716 | 1358.5    | 1359 | 1358.75 | -.5       |
| 144. | DANCAVAS | 85-2725 | 221.5     | 222  | 221.75  | -.5       |
| 145. | DANCAVAS | 85-2708 | 109.5     | 110  | 109.75  | -.5       |
| 146. | DANCAVAS | 85-2721 | 745.59998 | 746  | 745.8   | -.4000244 |
| 147. | DANCAVAS | 85-2666 | 2.5999999 | 3    | 2.8     | -.4000001 |
| 148. | DANCAVAS | 85-2739 | 17.6      | 18   | 17.8    | -.3999996 |
| 149. | DANCAVAS | 85-2678 | 66.699997 | 67   | 66.85   | -.3000031 |
| 150. | DANCAVAS | 85-2712 | 112.7     | 113  | 112.85  | -.3000031 |
| 151. | DANCAVAS | 85-2695 | 8.6999998 | 9    | 8.85    | -.3000002 |
| 152. | DANCAVAS | 85-2672 | 11.7      | 12   | 11.85   | -.3000002 |
| 153. | DANCAVAS | 85-2723 | 18.799999 | 19   | 18.9    | -.2000008 |
| 154. | DANCAVAS | 85-2668 | 37.799999 | 38   | 37.9    | -.2000008 |

|      |          |         |            |      |        |           |
|------|----------|---------|------------|------|--------|-----------|
| 155. | DANCAVAS | 85-2764 | 12.9       | 13   | 12.95  | -.1000004 |
| 156. | DANCAVAS | 85-2714 | 25.9       | 26   | 25.95  | -.1000004 |
| 157. | DANCAVAS | 85-2752 | 3          | 3    | 3      | 0         |
| 158. | DANCAVAS | 85-2722 | 266        | 266  | 266    | 0         |
| 159. | DANCAVAS | 85-2734 | 399        | 399  | 399    | 0         |
| 160. | DANCAVAS | 85-2707 | 10         | 10   | 10     | 0         |
| 161. | DANCAVAS | 85-2667 | 10         | 10   | 10     | 0         |
| 162. | DANCAVAS | 85-2773 | 73         | 73   | 73     | 0         |
| 163. | DANCAVAS | 85-2683 | 536        | 536  | 536    | 0         |
| 164. | DANCAVAS | 85-2748 | 18         | 18   | 18     | 0         |
| 165. | DANCAVAS | 85-2761 | 0          | 0    | 0      | 0         |
| 166. | DANCAVAS | 85-2744 | 0          | 0    | 0      | 0         |
| 167. | DANCAVAS | 85-2758 | 165        | 165  | 165    | 0         |
| 168. | DANCAVAS | 85-2717 | 52         | 52   | 52     | 0         |
| 169. | DANCAVAS | 85-2779 | 163        | 163  | 163    | 0         |
| 170. | DANCAVAS | 85-2686 | 0          | 0    | 0      | 0         |
| 171. | DANCAVAS | 85-2677 | 14         | 14   | 14     | 0         |
| 172. | DANCAVAS | 85-2742 | 78         | 78   | 78     | 0         |
| 173. | DANCAVAS | 85-2679 | 0          | 0    | 0      | 0         |
| 174. | DANCAVAS | 85-2705 | 1155       | 1155 | 1155   | 0         |
| 175. | DANCAVAS | 85-2681 | 1          | 1    | 1      | 0         |
| 176. | DANCAVAS | 85-2671 | 112        | 112  | 112    | 0         |
| 177. | DANCAVAS | 85-2732 | 29         | 29   | 29     | 0         |
| 178. | DANCAVAS | 85-2675 | 1241       | 1241 | 1241   | 0         |
| 179. | DANCAVAS | 85-2711 | 38         | 38   | 38     | 0         |
| 180. | DANCAVAS | 85-2715 | 1          | 1    | 1      | 0         |
| 181. | DANCAVAS | 85-2777 | 0          | 0    | 0      | 0         |
| 182. | DANCAVAS | 85-2713 | 735        | 735  | 735    | 0         |
| 183. | DANCAVAS | 85-2740 | 32         | 32   | 32     | 0         |
| 184. | DANCAVAS | 85-2756 | 0          | 0    | 0      | 0         |
| 185. | DANCAVAS | 85-2706 | 205        | 205  | 205    | 0         |
| 186. | DANCAVAS | 85-2772 | 10         | 10   | 10     | 0         |
| 187. | DANCAVAS | 85-2718 | 0          | 0    | 0      | 0         |
| 188. | DANCAVAS | 85-2759 | 0          | 0    | 0      | 0         |
| 189. | DANCAVAS | 85-2697 | 0          | 0    | 0      | 0         |
| 190. | DANCAVAS | 85-2698 | 53         | 53   | 53     | 0         |
| 191. | DANCAVAS | 85-2768 | 0          | 0    | 0      | 0         |
| 192. | DANCAVAS | 85-2766 | 55.099998  | 55   | 55.05  | .0999985  |
| 193. | DANCAVAS | 85-2727 | 68.099998  | 68   | 68.05  | .0999985  |
| 194. | DANCAVAS | 85-2760 | 64.199997  | 64   | 64.1   | .1999969  |
| 195. | DANCAVAS | 85-2780 | 97.199997  | 97   | 97.1   | .1999969  |
| 196. | DANCAVAS | 85-2733 | 35.200001  | 35   | 35.1   | .2000008  |
| 197. | DANCAVAS | 85-2674 | 262.299999 | 262  | 262.15 | .2999878  |
| 198. | DANCAVAS | 85-2774 | 345.299999 | 345  | 345.15 | .2999878  |
| 199. | DANCAVAS | 85-2684 | 55.299999  | 55   | 55.15  | .2999992  |
| 200. | DANCAVAS | 85-2737 | 115.4      | 115  | 115.2  | .4000015  |
| 201. | DANCAVAS | 85-2735 | 877.59998  | 877  | 877.3  | .5999756  |
| 202. | DANCAVAS | 85-2741 | 201.7      | 201  | 201.35 | .6999969  |
| 203. | DANCAVAS | 85-2771 | 1          | 0    | .5     | 1         |
| 204. | DANCAVAS | 85-2746 | 323        | 322  | 322.5  | 1         |
| 205. | DANCAVAS | 85-2724 | 266        | 265  | 265.5  | 1         |
| 206. | DANCAVAS | 85-2699 | 56.200001  | 55   | 55.6   | 1.200001  |
| 207. | DANCAVAS | 85-2680 | 693.5      | 692  | 692.75 | 1.5       |
| 208. | DANCAVAS | 85-2731 | 108.7      | 107  | 107.85 | 1.699997  |
| 209. | DANCAVAS | 85-2720 | 831        | 829  | 830    | 2         |
| 210. | DANCAVAS | 85-2769 | 35         | 33   | 34     | 2         |
| 211. | DANCAVAS | 85-2694 | 538        | 536  | 537    | 2         |
| 212. | DANCAVAS | 85-2765 | 170        | 168  | 169    | 2         |
| 213. | DANCAVAS | 85-2745 | 103        | 100  | 101.5  | 3         |
| 214. | DANCAVAS | 85-2755 | 304.70001  | 301  | 302.85 | 3.700012  |

|      |          |         |           |      |         |          |
|------|----------|---------|-----------|------|---------|----------|
| 215. | DANCAVAS | 85-2710 | 611.70001 | 608  | 609.85  | 3.700012 |
| 216. | DANCAVAS | 85-2767 | 920       | 916  | 918     | 4        |
| 217. | DANCAVAS | 85-2665 | 306       | 302  | 304     | 4        |
| 218. | DANCAVAS | 85-2778 | 614.79999 | 610  | 612.4   | 4.799988 |
| 219. | DANCAVAS | 85-2757 | 1466.9    | 1460 | 1463.45 | 6.900024 |
| 220. | DANCAVAS | 85-2728 | 476       | 469  | 472.5   | 7        |
| 221. | DANCAVAS | 85-2775 | 244       | 236  | 240     | 8        |
| 222. | DANCAVAS | 85-2743 | 123.4     | 112  | 117.7   | 11.4     |
| 223. | DANCAVAS | 85-2709 | 12        | 0    | 6       | 12       |
| 224. | DANCAVAS | 85-2730 | 275       | 261  | 268     | 14       |
| 225. | DANCAVAS | 85-2776 | 358.5     | 344  | 351.25  | 14.5     |
| 226. | DANCAVAS | 85-2762 | 81.5      | 47   | 64.25   | 34.5     |
| 227. | DANCAVAS | 85-2702 | 857.70001 | 809  | 833.35  | 48.70001 |
| 228. | DANCAVAS | 85-2729 | 1739.5    | 1678 | 1708.75 | 61.5     |
| 229. | DANCAVAS | 85-2682 | 693.70001 | 630  | 661.85  | 63.70001 |
| 230. | DANCAVAS | 85-2781 | 1541      | 801  | 1171    | 740      |

```

20 .
21 . *concord ct_agatston_score cac_valid_2, loa(regline)
22 .
23 .
24 . /*number of paired differences that deviated at least 50 HU from each other*/
25 . gen absdiff= abs(diff)

26 . sort diff

27 . list study record_id ct_agatston_score cac_valid_2 mean diff if absdiff>50

```

|      | study    | record~d | ct_agat~e | cac_va~2 | mean    | diff     |
|------|----------|----------|-----------|----------|---------|----------|
| 1.   | DanRisk  | 2658     | 3601      | 4139     | 3870    | -538     |
| 2.   | DanRisk  | 2407     | 6         | 529      | 267.5   | -523     |
| 3.   | DANCAVAS | 85-2685  | 311       | 433      | 372     | -122     |
| 4.   | DanRisk  | 1269     | 0         | 101      | 50.5    | -101     |
| 5.   | DanRisk  | 2418     | 620       | 704      | 662     | -84      |
| 6.   | DanRisk  | 1025     | 0         | 82       | 41      | -82      |
| 7.   | DanRisk  | 1545     | 400       | 472      | 436     | -72      |
| 8.   | DanRisk  | 2032     | 0         | 51       | 25.5    | -51      |
| 227. | DANCAVAS | 85-2729  | 1739.5    | 1678     | 1708.75 | 61.5     |
| 228. | DANCAVAS | 85-2682  | 693.70001 | 630      | 661.85  | 63.70001 |
| 229. | DanRisk  | 2559     | 3600      | 3062     | 3331    | 538      |
| 230. | DANCAVAS | 85-2781  | 1541      | 801      | 1171    | 740      |

```

28 .
29 . gen ind50plus = cond(absdiff>50, 1, 0)

30 . tab ind50plus

```

| ind50plus | Freq. | Percent | Cum.   |
|-----------|-------|---------|--------|
| 0         | 218   | 94.78   | 94.78  |
| 1         | 12    | 5.22    | 100.00 |
| Total     | 230   | 100.00  |        |

```

31 .
32 .
33 . /**** Figure 2: scatter of differences vs means ****/
34 . /**** Figure 2: scatter of differences vs means ****/
35 . /**** Figure 2: scatter of differences vs means ****/
36 . sort mean

37 . twoway (scatter diff mean), xtitle("Interrater means [HU]") ytitle("Interrater differences [HU]") xlabel(0(500)400)

38 . graph export "Fig_2_2023_03_29.tif", as(tif) name("Graph") replace
    (file Fig_2_2023_03_29.tif not found)
    file Fig_2_2023_03_29.tif saved as TIFF format

39 . graph export "Fig_2_2023_03_29.png", as(png) replace
    (file Fig_2_2023_03_29.png not found)
    file Fig_2_2023_03_29.png saved as PNG format

40 .
41 .
42 . /**** Fig. 3, right (Suppl. Fig. G (Gerke 2021)) ****/
43 . /**** Fig. 3, right (Suppl. Fig. G (Gerke 2021)) ****/
44 . /**** Fig. 3, right (Suppl. Fig. G (Gerke 2021)) ****/
45 . scatter diff mean, xtitle("Interrater means [HU]") ytitle("Interrater differences [HU]") xlabel(0(500)400, angle=45)
    > ttern(dash) yline(-82.45 37.70, lcolor(black) lpattern(solid))

46 .
47 . graph export "Suppl_Fig_interrater_2021_05_07.tif", as(tif) name("Graph") replace
    (file Suppl_Fig_interrater_2021_05_07.tif not found)
    file Suppl_Fig_interrater_2021_05_07.tif saved as TIFF format

48 . graph export "Suppl_Fig_interrater_2021_05_07.png", as(png) replace
    (file Suppl_Fig_interrater_2021_05_07.png not found)
    file Suppl_Fig_interrater_2021_05_07.png saved as PNG format

49 . graph save "Graph" "Suppl_Fig_interrater_2021_05_07.gph", replace
    (file Suppl_Fig_interrater_2021_05_07.gph not found)
    file Suppl_Fig_interrater_2021_05_07.gph saved

50 .
51 . /*coverage nonparametric Limits of Agreement*/
52 . gen out0 = cond(diff<-82.45 | diff>37.70, 1, 0)

53 . tab out0

```

| out0  | Freq. | Percent | Cum.   |
|-------|-------|---------|--------|
| 0     | 220   | 95.65   | 95.65  |
| 1     | 10    | 4.35    | 100.00 |
| Total | 230   | 100.00  |        |

```

54 .
55 .
56 . /**** Fig. 3, left (classical BA plot) ****/
57 . /**** Fig. 3, left (classical BA plot) ****/
58 . /**** Fig. 3, left (classical BA plot) ****/
59 . sum diff

```

| Variable | Obs | Mean      | Std. dev. | Min  | Max |
|----------|-----|-----------|-----------|------|-----|
| diff     | 230 | -.9313044 | 80.2513   | -538 | 740 |

```
60 . /*Bland-Altman Limits of Agreement*/
61 . di -.9313044 - invnormal(.975)*80.2513
    -158.22096
```

```
62 . di -.9313044 + invnormal(.975)*80.2513
    156.35835
```

```
63 .
64 . /*coverage Bland-Altman Limits of Agreement*/
65 . gen out_clasBA = cond(diff<-158.221 | diff>156.358, 1, 0)
```

```
66 . tab out_clasBA
```

| out_clasBA | Freq. | Percent | Cum.   |
|------------|-------|---------|--------|
| 0          | 226   | 98.26   | 98.26  |
| 1          | 4     | 1.74    | 100.00 |
| Total      | 230   | 100.00  |        |

```
67 .
```

```
68 . sort mean
```

```
69 . twoway (scatter diff mean), xtitle("Interrater means [HU]") ytitle("Interrater differences [HU]") xlabel(0(500)400)
    > (-158.221 156.358, lcolor(red) lpattern(solid)) yline(-.9313044, lcolor(red) lpattern(dash))
```

```
70 . graph export "Class_BA_Fig_interrater__2023_03_29.tif", as(tif) name("Graph") replace
    (file Class_BA_Fig_interrater__2023_03_29.tif not found)
    file Class_BA_Fig_interrater__2023_03_29.tif saved as TIFF format
```

```
71 . graph export "Class_BA_Fig_interrater__2023_03_29.png", as(png) replace
    (file Class_BA_Fig_interrater__2023_03_29.png not found)
    file Class_BA_Fig_interrater__2023_03_29.png saved as PNG format
```

```
72 . graph save "Graph" "Class_BA_Fig_interrater__2023_03_29.gph", replace
    (file Class_BA_Fig_interrater__2023_03_29.gph not found)
    file Class_BA_Fig_interrater__2023_03_29.gph saved
```

```
73 .
```

```
74 . save tempdat.dta, replace
    (file tempdat.dta not found)
    file tempdat.dta saved
```

```
75 .
```

```
76 .
```

```
77 . /**** Fractional Polynomial Regression (m=2) ****/
78 . /**** Fractional Polynomial Regression (m=2) ****/
79 . /**** Eq. (6), Figure 5, top right ****/
80 . /**** Fractional Polynomial Regression (m=2) ****/
81 . use tempdat.dta, clear
```

```
82 . sum mean diff
```

| Variable | Obs | Mean      | Std. dev. | Min  | Max     |
|----------|-----|-----------|-----------|------|---------|
| mean     | 230 | 250.5474  | 577.7715  | 0    | 3946.65 |
| diff     | 230 | -.9313044 | 80.2513   | -538 | 740     |

```
83 . /*using FPR the continuous outcome must be positive, CACS is nonnegative*/
84 . gen mean1 = mean+.01
```

```

85 .
86 . fp <mean1>, dimension(2): regress absdiff <mean1>
(fitting 44 models)
(....10%....20%....30%....40%....50%....60%....70%....80%....90%....100%)

```

Fractional polynomial comparisons:

| mean1   | Test<br>df | Deviance | Residual<br>std. dev. | Deviance<br>diff. | P     | Powers |
|---------|------------|----------|-----------------------|-------------------|-------|--------|
| omitted | 4          | 2659.026 | 78.550                | 57.121            | 0.000 |        |
| linear  | 3          | 2603.657 | 69.794                | 1.751             | 0.633 | 1      |
| m = 1   | 2          | 2603.657 | 69.794                | 1.751             | 0.425 | 1      |
| m = 2   | 0          | 2601.905 | 69.682                | 0.000             | --    | .5 2   |

Note: **Test df** is degrees of freedom, and **P = P > F** is sig. level for tests comparing models vs. model with m = 2 based on deviance difference, F(df, 225).

| Source   | SS         | df  | MS         | Number of obs | = | 230    |
|----------|------------|-----|------------|---------------|---|--------|
| Model    | 310726.502 | 2   | 155363.251 | F(2, 227)     | = | 32.00  |
| Residual | 1102217.63 | 227 | 4855.58426 | Prob > F      | = | 0.0000 |
|          |            |     |            | R-squared     | = | 0.2199 |
|          |            |     |            | Adj R-squared | = | 0.2130 |
| Total    | 1412944.13 | 229 | 6170.0617  | Root MSE      | = | 69.682 |

| absdiff | Coefficient | Std. err. | t    | P> t  | [95% conf. interval] |          |
|---------|-------------|-----------|------|-------|----------------------|----------|
| mean1_1 | 1.029373    | .5150383  | 2.00 | 0.047 | .0145052             | 2.04424  |
| mean1_2 | .0000143    | 3.42e-06  | 4.19 | 0.000 | 7.59e-06             | .0000211 |
| _cons   | .6248949    | 6.260334  | 0.10 | 0.921 | -11.7109             | 12.96069 |

```

87 . fp_select, alpha(0.05)

selected FP model: powers = (1), df = 3

88 .
89 . gen sd2 = (1.029373*mean1_1 + .0000143 *mean1_2 + .6248949) * sqrt(_pi/2)

90 . gen repcoeff2_upp = 1.96*sd2

91 . gen repcoeff2_low = -1.96*sd2

92 .
93 . sort mean

94 . twoway (scatter diff mean) (line repcoeff2_upp mean, lcolor(green)) (line repcoeff2_low mean, lcolor(green)), xti
> ]" xlabel(0(500)4000, angle(45)) ylabel(-700(200)700, angle(0)) legend(off) yline(0, lcolor(green) lpattern(dash

95 . graph export "Re-analysis_Fig_interrater_m2_2023_03_30.png", as(png) replace
(file Re-analysis_Fig_interrater_m2_2023_03_30.png not found)
file Re-analysis_Fig_interrater_m2_2023_03_30.png saved as PNG format

96 . graph save "Graph" "Re-analysis_Fig_interrater_m2_2023_03_30.gph", replace
(file Re-analysis_Fig_interrater_m2_2023_03_30.gph not found)
file Re-analysis_Fig_interrater_m2_2023_03_30.gph saved

97 .

```

```
98 . gen out2 = cond(repcoeff2_upp<diff | repcoeff2_low>diff, 1, 0)
```

```
99 . tab out2
```

| out2  | Freq. | Percent | Cum.   |
|-------|-------|---------|--------|
| 0     | 210   | 91.30   | 91.30  |
| 1     | 20    | 8.70    | 100.00 |
| Total | 230   | 100.00  |        |

```
100 .
```

```
101 . li ct_agatston_score cac_valid_2 mean diff mean1 repcoeff2_upp repcoeff2_low if out2==1
```

|      | ct_aga~e | cac_va~2 | mean  | diff | mean1   | repcoe~p | repcoef~w |
|------|----------|----------|-------|------|---------|----------|-----------|
| 87.  | 0        | 8        | 4     | -8   | 4.01    | 6.599235 | -6.599235 |
| 88.  | 8        | 0        | 4     | 8    | 4.01    | 6.599235 | -6.599235 |
| 89.  | 9        | 0        | 4.5   | 9    | 4.51    | 6.905801 | -6.905801 |
| 91.  | 12       | 0        | 6     | 12   | 6.01    | 7.735383 | -7.735383 |
| 92.  | 0        | 14       | 7     | -14  | 7.01    | 8.231735 | -8.231735 |
| 93.  | 14       | 0        | 7     | 14   | 7.01    | 8.231735 | -8.231735 |
| 97.  | 18       | 0        | 9     | 18   | 9.01    | 9.128068 | -9.128068 |
| 104. | 24       | 1        | 12.5  | 23   | 12.51   | 10.48425 | -10.48425 |
| 108. | 23       | 5        | 14    | 18   | 14.01   | 11.00667 | -11.00667 |
| 114. | 0        | 51       | 25.5  | -51  | 25.51   | 14.32947 | -14.32947 |
| 122. | 10       | 60       | 35    | -50  | 35.01   | 16.53994 | -16.53994 |
| 128. | 0        | 82       | 41    | -82  | 41.01   | 17.78737 | -17.78737 |
| 130. | 0        | 101      | 50.5  | -101 | 50.51   | 19.59589 | -19.59589 |
| 139. | 81.5     | 47       | 64.25 | 34.5 | 64.26   | 21.95036 | -21.95036 |
| 176. | 6        | 529      | 267.5 | -523 | 267.51  | 45.40679 | -45.40679 |
| 186. | 311      | 433      | 372   | -122 | 372.01  | 55.16795 | -55.16795 |
| 190. | 400      | 472      | 436   | -72  | 436.01  | 61.0134  | -61.0134  |
| 207. | 620      | 704      | 662   | -84  | 662.01  | 81.99116 | -81.99116 |
| 220. | 1541     | 801      | 1171  | 740  | 1171.01 | 136.2352 | -136.2352 |
| 227. | 3600     | 3062     | 3331  | 538  | 3331.01 | 537.2418 | -537.2418 |

```
102 .
```

```
103 .
```

```
104 . /**** Fractional Polynomial Regression (m=1) ****/
```

```
105 . /*** Eq. (9), Figure 5, top left ****/
```

```
106 . /**** Fractional Polynomial Regression (m=1) ****/
```

```
107 . /**** Fractional Polynomial Regression (m=1) ****/
```

```
108 . regress absdiff mean
```

| Source   | SS         | df  | MS         | Number of obs | = | 230    |
|----------|------------|-----|------------|---------------|---|--------|
| Model    | 302300.936 | 1   | 302300.936 | F(1, 228)     | = | 62.06  |
| Residual | 1110643.19 | 228 | 4871.24208 | Prob > F      | = | 0.0000 |
|          |            |     |            | R-squared     | = | 0.2140 |
|          |            |     |            | Adj R-squared | = | 0.2105 |
| Total    | 1412944.13 | 229 | 6170.0617  | Root MSE      | = | 69.794 |

| absdiff | Coefficient | Std. err. | t    | P> t  | [95% conf. interval] |
|---------|-------------|-----------|------|-------|----------------------|
| mean    | .0628848    | .0079826  | 7.88 | 0.000 | .0471557 .078614     |
| _cons   | .6730657    | 5.01791   | 0.13 | 0.893 | -9.214341 10.56047   |

```

109 . gen sd1 = (.0628848*mean + .6730657 ) * sqrt(_pi/2)
110 . gen repcoeff1_upp = 1.96*sd1
111 . gen repcoeff1_low = -1.96*sd1
112 .
113 . sort mean

114 . twoway (scatter diff mean) (line repcoeff1_upp mean, lcolor(green)) (line repcoeff1_low mean, lcolor(green)), xti
> ]") xlabel(0(500)4000, angle(45)) ylabel(-700(200)700, angle(0)) legend(off) yline(0, lcolor(green) lpattern(dash

115 . graph export "Re-analysis_Fig_interrater_m1_2023_03_30.png", as(png) replace
(file Re-analysis_Fig_interrater_m1_2023_03_30.png not found)
file Re-analysis_Fig_interrater_m1_2023_03_30.png saved as PNG format

116 . graph save "Graph" "Re-analysis_Fig_interrater_m1_2023_03_30.gph", replace
(file Re-analysis_Fig_interrater_m1_2023_03_30.gph not found)
file Re-analysis_Fig_interrater_m1_2023_03_30.gph saved

117 .
118 . gen out1 = cond(repcoeff1_upp<diff | repcoeff1_low>diff, 1, 0)

119 . tab out1

```

| out1  | Freq. | Percent | Cum.   |
|-------|-------|---------|--------|
| 0     | 195   | 84.78   | 84.78  |
| 1     | 35    | 15.22   | 100.00 |
| Total | 230   | 100.00  |        |

```

120 .
121 .
122 . /**** Fractional Polynomial Regression (m=3) ****/
123 . /**** Figure 5, bottom, left ****/
124 . /**** ****/
125 . /**** ****/
126 . use tempdat.dta, clear

127 . sum mean diff

```

| Variable | Obs | Mean      | Std. dev. | Min  | Max     |
|----------|-----|-----------|-----------|------|---------|
| mean     | 230 | 250.5474  | 577.7715  | 0    | 3946.65 |
| diff     | 230 | -.9313044 | 80.2513   | -538 | 740     |

```

128 . gen mean1 = mean+.01

129 .
130 . fp <mean1>, dimension(3): regress absdiff <mean1>
(fitting 164 models)
(....10%....20%....30%....40%....50%....60%....70%....80%....90%....100%)

```

Fractional polynomial comparisons:

| mean1   | Test<br>df | Deviance | Residual<br>std. dev. | Deviance<br>diff. | P     | Powers |
|---------|------------|----------|-----------------------|-------------------|-------|--------|
| omitted | 5          | 2659.026 | 78.550                | 57.356            | 0.000 |        |
| linear  | 4          | 2603.657 | 69.794                | 1.986             | 0.746 | 1      |
| m = 1   | 3          | 2603.657 | 69.794                | 1.986             | 0.585 | 1      |
| m = 2   | 1          | 2601.905 | 69.682                | 0.235             | 0.633 | .5 2   |
| m = 3   | 0          | 2601.671 | 69.800                | 0.000             | --    | .5 3 3 |

Note: Test df is degrees of freedom, and P =  $P > F$  is sig. level for tests comparing models vs. model with  $m = 3$  based on deviance difference,  $F(df, 224)$ .

| Source   | SS         | df  | MS         | Number of obs | = | 230    |
|----------|------------|-----|------------|---------------|---|--------|
| Model    | 311851.882 | 3   | 103950.627 | F(3, 226)     | = | 21.34  |
| Residual | 1101092.25 | 226 | 4872.08959 | Prob > F      | = | 0.0000 |
|          |            |     |            | R-squared     | = | 0.2207 |
|          |            |     |            | Adj R-squared | = | 0.2104 |
| Total    | 1412944.13 | 229 | 6170.0617  | Root MSE      | = | 69.8   |

| absdiff | Coefficient | Std. err. | t     | P> t  | [95% conf. interval] |          |
|---------|-------------|-----------|-------|-------|----------------------|----------|
| mean1_1 | 1.019461    | .5767764  | 1.77  | 0.078 | -.1170861            | 2.156009 |
| mean1_2 | 6.64e-08    | 6.24e-08  | 1.06  | 0.288 | -5.66e-08            | 1.89e-07 |
| mean1_3 | -7.62e-09   | 7.55e-09  | -1.01 | 0.314 | -2.25e-08            | 7.26e-09 |
| _cons   | .8186861    | 6.371187  | 0.13  | 0.898 | -11.73584            | 13.37321 |

131 . fp\_select, alpha(0.05)

selected FP model: powers = (1), df = 4

132 .

133 . gen sd3 = (1.019461 \*mean1\_1 + 6.64e-08\*mean1\_2 + -7.62e-09\*mean1\_3 + .8186861) \* sqrt(\_pi/2)

134 . gen repcoeff3\_upp = 1.96\*sd3

135 . gen repcoeff3\_low = -1.96\*sd3

136 .

137 . sort mean

138 . twoway (scatter diff mean) (line repcoeff3\_upp mean, lcolor(green)) (line repcoeff3\_low mean, lcolor(green)), xti  
> "]") xlabel(0(500)4000, angle(45)) ylabel(-700(200)700, angle(0)) legend(off) yline(0, lcolor(green) lpattern(dash,

139 . graph export "Re-analysis\_Fig\_interrater\_2023\_03\_17.tif", as(tif) name("Graph") replace  
(file Re-analysis\_Fig\_interrater\_2023\_03\_17.tif not found)  
file Re-analysis\_Fig\_interrater\_2023\_03\_17.tif saved as TIFF format

140 . graph export "Re-analysis\_Fig\_interrater\_m3\_2023\_03\_30.png", as(png) replace  
(file Re-analysis\_Fig\_interrater\_m3\_2023\_03\_30.png not found)  
file Re-analysis\_Fig\_interrater\_m3\_2023\_03\_30.png saved as PNG format

141 . graph save "Graph" "Re-analysis\_Fig\_interrater\_m3\_2023\_03\_30.gph", replace  
(file Re-analysis\_Fig\_interrater\_m3\_2023\_03\_30.gph not found)  
file Re-analysis\_Fig\_interrater\_m3\_2023\_03\_30.gph saved

142 .

143 . gen out3 = cond(repcoeff3\_upp<diff | repcoeff3\_low>diff, 1, 0)

144 . tab out3

| out3  | Freq. | Percent | Cum.   |
|-------|-------|---------|--------|
| 0     | 211   | 91.74   | 91.74  |
| 1     | 19    | 8.26    | 100.00 |
| Total | 230   | 100.00  |        |

145 .

146 . li ct\_agatston\_score cac\_valid\_2 mean diff mean1 repcoe~p repcoef~w if out3==1

|      | ct_aga~e | cac_va~2 | mean | diff | mean1 | repcoe~p | repcoef~w |
|------|----------|----------|------|------|-------|----------|-----------|
| 87.  | 0        | 8        | 4    | -8   | 4.01  | 7.025968 | -7.025968 |
| 88.  | 8        | 0        | 4    | 8    | 4.01  | 7.025968 | -7.025968 |
| 89.  | 9        | 0        | 4.5  | 9    | 4.51  | 7.329437 | -7.329437 |
| 91.  | 12       | 0        | 6    | 12   | 6.01  | 8.150497 | -8.150497 |
| 92.  | 0        | 14       | 7    | -14  | 7.01  | 8.641632 | -8.641632 |
| 93.  | 14       | 0        | 7    | 14   | 7.01  | 8.641632 | -8.641632 |
| 97.  | 18       | 0        | 9    | 18   | 9.01  | 9.528266 | -9.528266 |
| 104. | 24       | 1        | 12.5 | 23   | 12.51 | 10.86891 | -10.86891 |

|      |      |     |       |      |         |          |           |
|------|------|-----|-------|------|---------|----------|-----------|
| 108. | 23   | 5   | 14    | 18   | 14.01   | 11.385   | -11.385   |
| 114. | 0    | 51  | 25.5  | -51  | 25.51   | 14.66138 | -14.66138 |
| 122. | 10   | 60  | 35    | -50  | 35.01   | 16.83301 | -16.83301 |
| 128. | 0    | 82  | 41    | -82  | 41.01   | 18.05486 | -18.05486 |
| 130. | 0    | 101 | 50.5  | -101 | 50.51   | 19.82083 | -19.82083 |
| 139. | 81.5 | 47  | 64.25 | 34.5 | 64.26   | 22.10877 | -22.10877 |
| 176. | 6    | 529 | 267.5 | -523 | 267.51  | 44.0905  | -44.0905  |
| 186. | 311  | 433 | 372   | -122 | 372.01  | 53.00646 | -53.00646 |
| 190. | 400  | 472 | 436   | -72  | 436.01  | 58.39326 | -58.39326 |
| 207. | 620  | 704 | 662   | -84  | 662.01  | 78.49463 | -78.49463 |
| 220. | 1541 | 801 | 1171  | 740  | 1171.01 | 137.2518 | -137.2518 |

```

147 .
148 .
149 . /*****/
150 . /*** Square root-transformation (as in Sevruckov 2005) ***/
151 . /*** Eq. (10), Figure 5, bottom right ****/
152 . /*****/
153 . use tempdat.dta, clear

```

```
154 . sum mean diff
```

| Variable | Obs | Mean      | Std. dev. | Min  | Max     |
|----------|-----|-----------|-----------|------|---------|
| mean     | 230 | 250.5474  | 577.7715  | 0    | 3946.65 |
| diff     | 230 | -.9313044 | 80.2513   | -538 | 740     |

```
155 . gen sqrtmean = sqrt(mean)
```

```
156 .
```

```
157 . regress absdiff sqrtmean, noconst
```

| Source   | SS         | df  | MS         | Number of obs | = | 230    |
|----------|------------|-----|------------|---------------|---|--------|
| Model    | 277348.795 | 1   | 277348.795 | F(1, 229)     | = | 53.03  |
| Residual | 1197672.8  | 229 | 5230.01224 | Prob > F      | = | 0.0000 |
|          |            |     |            | R-squared     | = | 0.1880 |
|          |            |     |            | Adj R-squared | = | 0.1845 |
| Total    | 1475021.6  | 230 | 6413.13739 | Root MSE      | = | 72.319 |

| absdiff  | Coefficient | Std. err. | t    | P> t  | [95% conf. interval] |
|----------|-------------|-----------|------|-------|----------------------|
| sqrtmean | 2.193837    | .3012607  | 7.28 | 0.000 | 1.600239 2.787434    |

```
158 .
```

```
159 . gen sd_sr = (2.193837*sqrtmean) * sqrt(_pi/2)
```

```
160 . gen repcoeff_sr_upp = 1.96*sd_sr
```

```
161 . gen repcoeff_sr_low = -1.96*sd_sr
```

```
162 .
```

```
163 . sort mean
```

```

164 . twoway (scatter diff mean) (line repcoeff_sr_upp mean, lcolor(green)) (line repcoeff_sr_low mean, lcolor(green)),
> [HU"] xlabel(0(500)4000, angle(45)) ylabel(-700(200)700, angle(0)) legend(off) yline(0, lcolor(green) lpattern(

```

```
165 . graph export "Re-analysis_Fig_interrater_sr_2023_03_30.png", as(png) replace
(file Re-analysis_Fig_interrater_sr_2023_03_30.png not found)
file Re-analysis_Fig_interrater_sr_2023_03_30.png saved as PNG format
```

```
166 . graph save "Graph" "Re-analysis_Fig_interrater_sr_2023_03_30.gph", replace
(file Re-analysis_Fig_interrater_sr_2023_03_30.gph not found)
file Re-analysis_Fig_interrater_sr_2023_03_30.gph saved
```

```
167 .
```

```
168 . gen out_sr = cond(repcoeff_sr_upp<diff | repcoeff_sr_low>diff, 1, 0)
```

```
169 . tab out_sr
```

| out_sr | Freq. | Percent | Cum.   |
|--------|-------|---------|--------|
| 0      | 219   | 95.22   | 95.22  |
| 1      | 11    | 4.78    | 100.00 |
| Total  | 230   | 100.00  |        |

```
170 .
```

```
171 . li ct_agatston_score cac_valid_2 mean diff mean repcoeff_sr_upp repcoeff_sr_low if out_sr==1
```

|      | ct_aga~e | cac_va~2 | mean  | diff | mean  | repcoe~p | repcoef~w |
|------|----------|----------|-------|------|-------|----------|-----------|
| 97.  | 18       | 0        | 9     | 18   | 9     | 16.16745 | -16.16745 |
| 104. | 24       | 1        | 12.5  | 23   | 12.5  | 19.05353 | -19.05353 |
| 114. | 0        | 51       | 25.5  | -51  | 25.5  | 27.21388 | -27.21388 |
| 122. | 10       | 60       | 35    | -50  | 35    | 31.88265 | -31.88265 |
| 128. | 0        | 82       | 41    | -82  | 41    | 34.50741 | -34.50741 |
| 130. | 0        | 101      | 50.5  | -101 | 50.5  | 38.29712 | -38.29712 |
| 176. | 6        | 529      | 267.5 | -523 | 267.5 | 88.14187 | -88.14187 |
| 186. | 311      | 433      | 372   | -122 | 372   | 103.9422 | -103.9422 |
| 220. | 1541     | 801      | 1171  | 740  | 1171  | 184.4161 | -184.4161 |
| 227. | 3600     | 3062     | 3331  | 538  | 3331  | 311.0339 | -311.0339 |
| 229. | 3601     | 4139     | 3870  | -538 | 3870  | 335.2555 | -335.2555 |

```
172 .
```

```
173 .
```

```
174 .
```

```
175 . /*****/
```

```
176 . /** Figure 3 **/
```

```
177 . /*****/
```

```
178 . graph combine "Class_BA_Fig_interrater__2023_03_29" "Suppl_Fig_interrater__2021_05_07.gph", row(1)
```

```
179 . graph export "Fig_3_2023_03_30.tif", as(tif) name("Graph") width(1200) replace
(file Fig_3_2023_03_30.tif not found)
file Fig_3_2023_03_30.tif saved as TIFF format
```

```
180 .
```

```
181 .
```

```
182 . /*****/
```

```
183 . /** Figure 5 **/
```

```
184 . /*****/
```

```
185 . graph combine "Re-analysis_Fig_interrater_m1_2023_03_30.gph" "Re-analysis_Fig_interrater_m2_2023_03_30.gph" "Re-analysis_Fig_interrater_m3_2023_03_30.gph", row(2)
```

```
186 . graph export "Fig_4__2023_03_30.tif", as(tif) name("Graph") width(1200) replace
    (file Fig_4__2023_03_30.tif not found)
    file Fig_4__2023_03_30.tif saved as TIFF format

187 .
188 . erase tempdat.dta

189 . /*** end-of-file ***/
190 .
    end of do-file

191 .
```
